# Supplementary material for: PGE2/EP4 skeleton interoception activity reduces vertebral endplate porosity and spinal pain with low-dose celecoxib
Source: PubMed Central journal article supplement (PMC8326284; doi:10.1038/s41413-021-00155-z), 2021-08-02

## Supplementary Figure 1

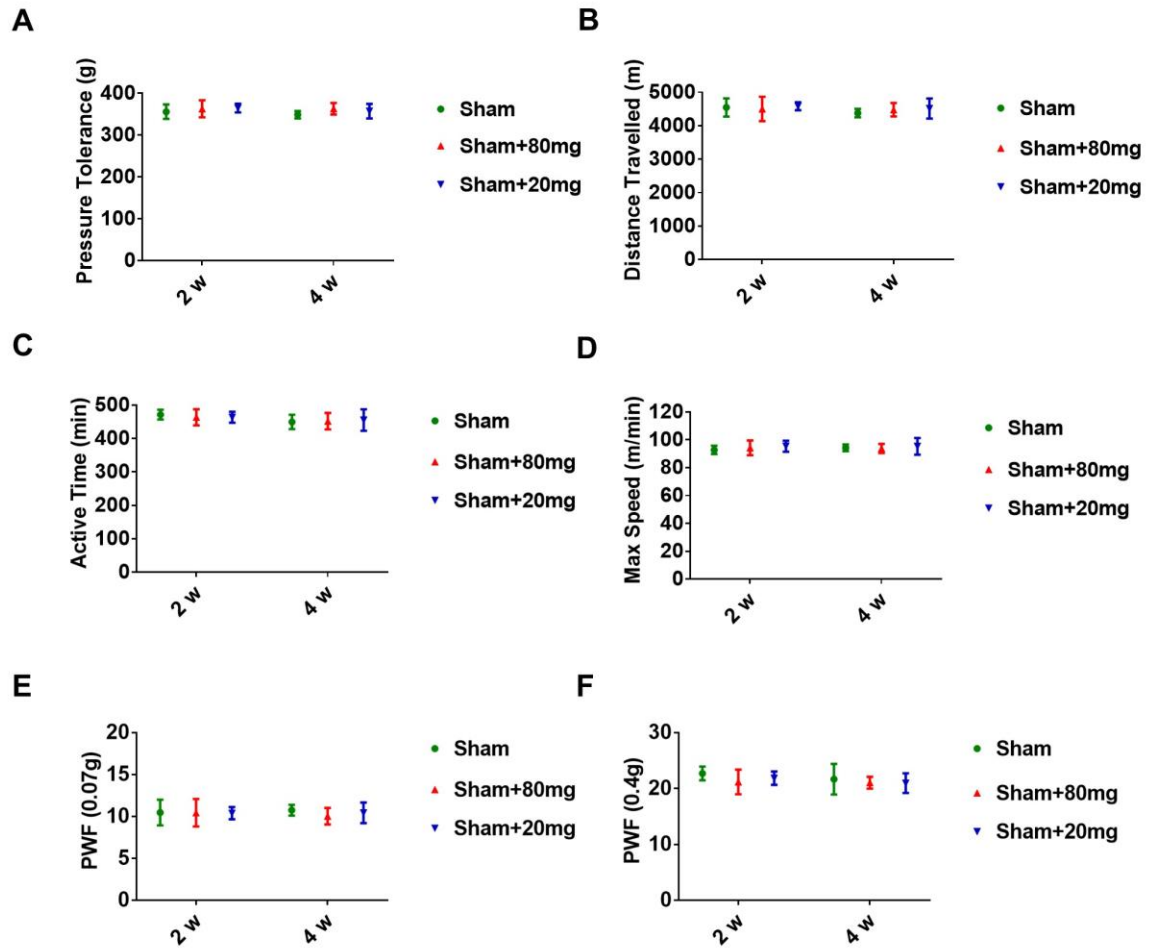

Supplementary Figure 2

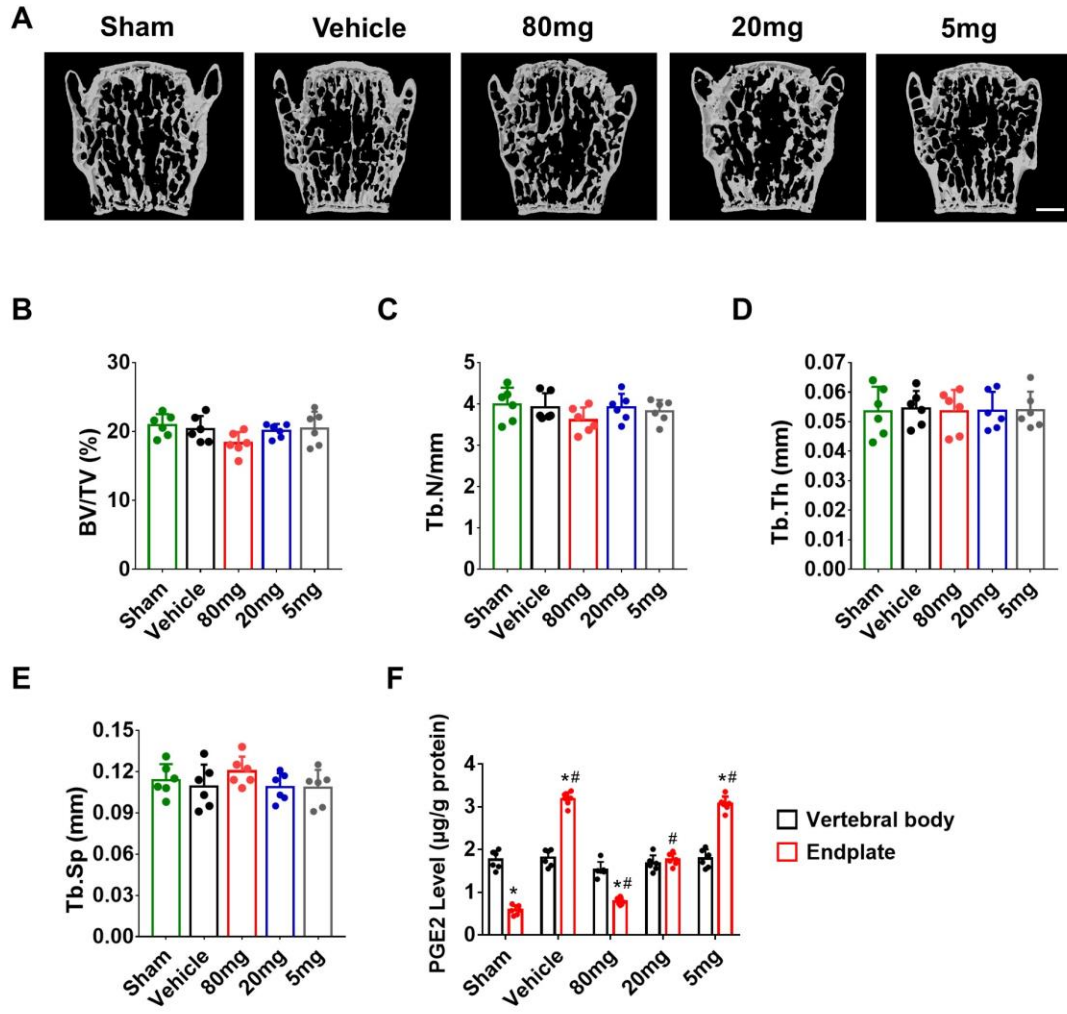

Supplement: 41413_2021_155_MOESM1_ESM.pdf [file 41413_2021_155_MOESM1_ESM.pdf]
